# Supplementary material for: Estimation of sexual behavior in the 18-to-24-years-old Iranian youth based on a crosswise model study
Source: PubMed Central journal article supplement (PMC3895705; doi:10.1186/1756-0500-7-28), 2014-01-13
Supplement: 1756-0500-7-28-S2.pdf [file 1756-0500-7-28-S2.pdf]

**In The Name Of God**

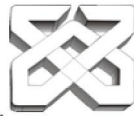

**Medical Science of Shahroud University**

❖ **Questionnaire research project** ❖

**Name and Family name:** Katayon Vakilian

**Advisor professor:** Dr, Seyed Abbas Mousavi, Dr. Afsaneh Keramat

**Counseling professor:** Dr. Reza Chaman

**Incorporated Organization:** Medical science Shahroud university

:

**Title proposal :** Development, Adaptation Iranian youth reproductive health instrument and survey of its situation in Shahroud universities in 1390

**Sagessted date:** 2010,2.12

---

**Address :** Squer Hafte Tir. Medical Science Shahroud University, Shahroud ,Iran
